# Supplementary material
Source: Springer Nature journal article supplement (https://www.springermedizin.de/resource/supplementary/12957_2012_1134_MOESM2_ESM.pdf/9561672)

## **FIGURE LEGEND**

**Figure 1. Cost Savings Attributable to Reduced Infective Complications and Anastomotic Leak (Presented in 2010 US Dollars)**

US = United States.

## FIGURE

Figure 1. Cost Savings Attributable to Reduced Infective Complications and Anastomotic Leak (Presented in 2010 US Dollars)

Deleted: Cost Savings Attributable to Reduced Complications (

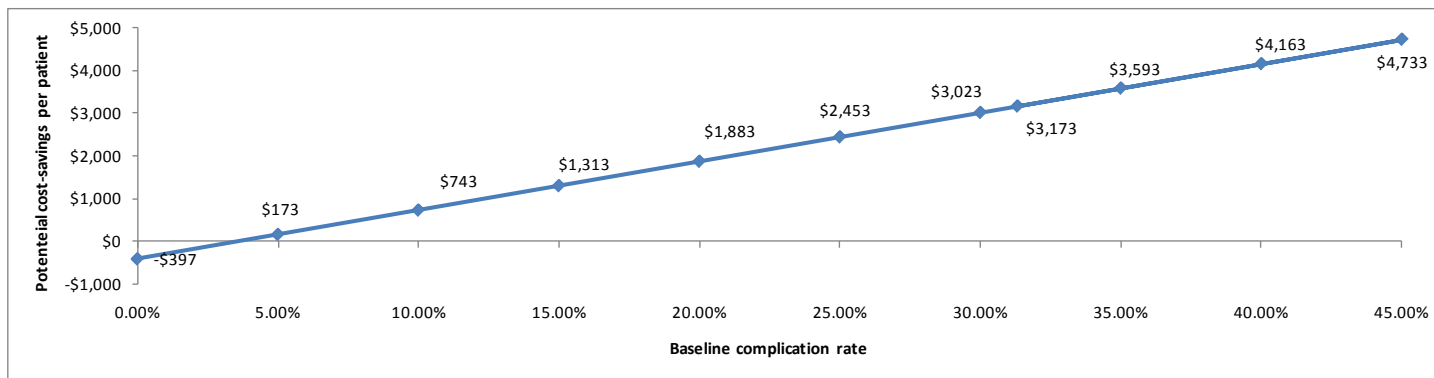

Supplement: MOESM2 [file 9561672]
